# Supplementary material
Source: MDPI journal article supplement (https://www.mdpi.com/2073-4352/11/8/854)
Supplement: s1 [file s1]

## Supporting information

### **Fe<sub>2</sub>O<sub>3</sub> microcubes derived from metal-organic frameworks for lithium-ion storage with excellent performance**

**Caini Zhong<sup>1</sup>, Jiaming Liu<sup>1</sup>, Yanhua Lu<sup>2</sup> and Haihui Zhang<sup>1,3\*</sup>**

<sup>1</sup> Faculty of Materials Metallurgy and Chemistry, Jiangxi University of Science and Technology, Ganzhou 341000, China; 1848585458@qq.com (C. Z.); jmlu\_jxust@163.com (J. L.); zhanghaihuiemail@gmail.com (H. Z.)

<sup>2</sup> Qingyuan Jiazhi New Materials Research Institute Co.Ltd., Qingyuan 511517, China; 2857936701@qq.com (Y. L.)

<sup>3</sup> Ganzhou Engineering Technology Research Center of Green Metallurgy and Process Intensification, Ganzhou 341000, China; 9120160046@jxust.edu.cn (H. Z.)

\* Faculty of Materials Metallurgy and Chemistry, Jiangxi University of Science and Technology, Ganzhou 341000, China; zhanghaihuiemail@gmail.com (H. Z.)

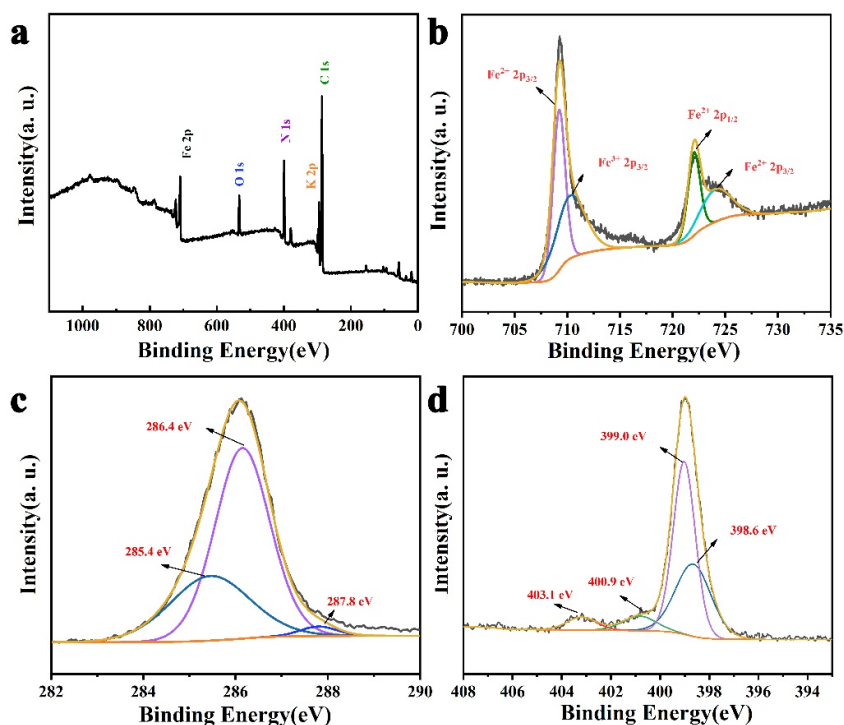

**Figure S1.** XPS spectra for PB precursor (a) XPS spectrum, (b) Fe 2p, (c) C 1s, (d) N 1s.

The elements in PB precursor were investigated via XPS. Fe, O, C, N and K elements were detected in the full XPS spectrum (Fig. S1a) of PB precursor, which the results is consistent with previous report [S.1]. Fig. S1b shows the high-resolution XPS spectrum of Fe 2p orbit, the two peaks at 709.3 and 722.1 eV are corresponding to  $\text{Fe}^{2+}$  ( $2p_{3/2}$ ) and  $\text{Fe}^{2+}$  ( $2p_{1/2}$ ), while the other two peaks at 710.5 and 724.3 eV correspond to  $\text{Fe}^{3+}$  ( $2p_{3/2}$ ) and  $\text{Fe}^{3+}$  ( $2p_{1/2}$ ). This result proves that part of  $\text{Fe}^{3+}$  is reduced. The Fig. S1c displays C 1s spectrum. Two peaks at 285.4 and 287.7 eV can be assigned to C-N bond, and the peak at 286.4 eV correspond to C-O bond. In Fig. S1d, the peaks situat at 398.6, 399.0, 400.9 and 403.1 eV reveal the presence of N in the  $-(\text{CN})$  [S.2, 3].

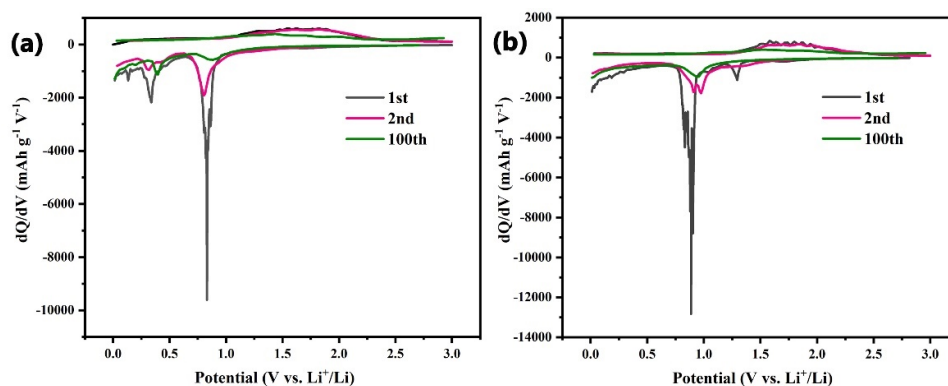

**Figure S2** The Differential capacity plot of (a)  $\text{Fe}_2\text{O}_3$ -500 and (b)  $\text{Fe}_2\text{O}_3$ -700.

For two samples, it is obvious that the first cycle is distinct substantially from those of the subsequent ones, indicating a different  $\text{Li}^+$  storage reaction taking place in the first cycle compared with the following cycles. During the first cycle of  $\text{Fe}_2\text{O}_3$ -500 (

Fig. S2a), the cathodic peaks at about 0.82 and 0.35V can be ascribed to the reduction of  $\text{Fe}^{3+}$  to  $\text{Fe}^0$ , with the decomposition of electrolyte to form a solid electrolyte interphase (SEI) film. In the follow cycles, the cathodic peaks are shifted, due to a structure rearrangement and associated with the reversible reduction of  $\text{Fe}^{3+}$ . The curves of  $\text{Fe}_2\text{O}_3$ -700 re as similar as  $\text{Fe}_2\text{O}_3$ -500 (Fig. S2b), but overlap parts are less than  $\text{Fe}_2\text{O}_3$ -500. This means that the cycling stability of  $\text{Fe}_2\text{O}_3$ -700 is worse than  $\text{Fe}_2\text{O}_3$ -500.

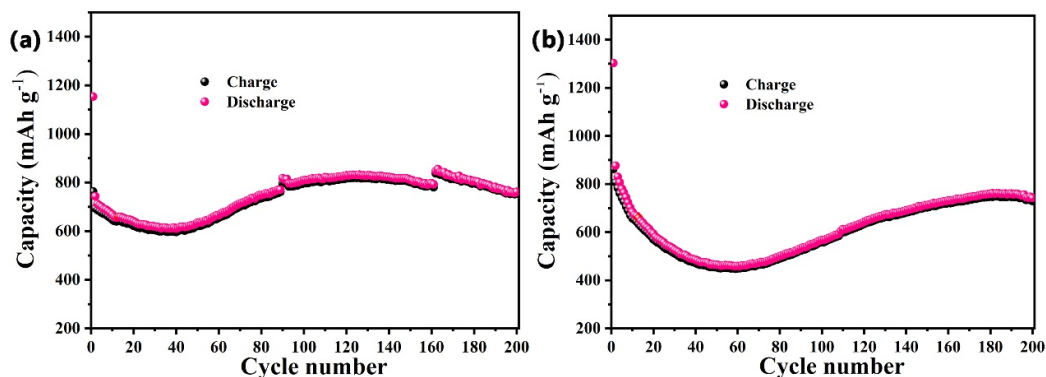

**Figure S3** The Cycling performance of (a)  $\text{Fe}_2\text{O}_3$ -400 and (b)  $\text{Fe}_2\text{O}_3$ -600.

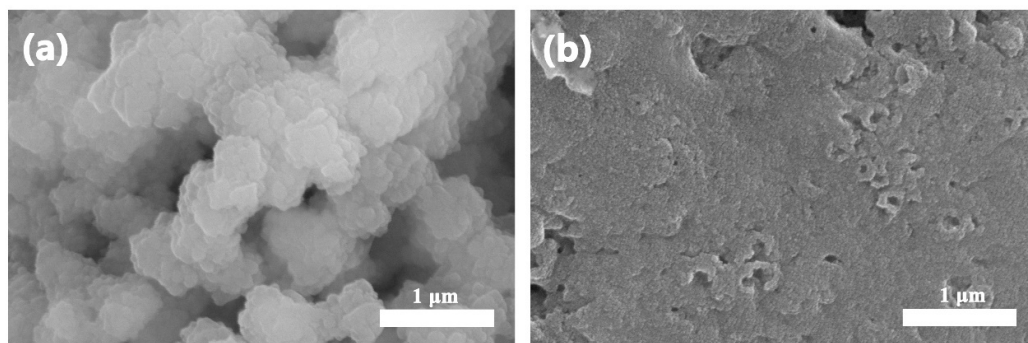

**Figure S4** SEM images of (a)  $\text{Fe}_2\text{O}_3$ -500 and (b)  $\text{Fe}_2\text{O}_3$ -700 after 300 cycles at 1000  $\text{mA g}^{-1}$ .

## References

- S.1. He, X.; Tian, L.; Qiao, M.; Zhang, J.; Geng, W.; Zhang, Q. A novel highly crystalline  $\text{Fe}_4(\text{Fe}(\text{CN})_6)_3$  concave cube anode material for Li-ion batteries with high capacity and long life. *J. Mater. Chem. A*, **2019**, 7, 11478-11486.
- S.2. Matienzo, J.; Yin L.I.; Grim, S.O.; William, E. X-ray photoelectron spectroscopy of nickel compounds. *Inorg. Chem.*, **1973**, 12, 2762-2769.
- S.3. Fluck, E.; Inoue, H.; Yanagisawa, S. Mössbauer and X - ray photoelectron spectroscopic studies of prussian blue and its related compounds. *Anorg. Allg. Chem.*, **1977**, 430, 241-249.
